# Supplementary material for: Biocompatible and acid-cleavable poly(ε-caprolactone)-acetal-poly(ethylene glycol)-acetal-poly(ε-caprolactone) triblock copolymers: synthesis, characterization and pH-triggered doxorubicin delivery
Source: Royal Society of Chemistry journal article supplement (doi:10.1039/c3tb21170c), 2013-01-01
Supplement: c3tb21170c.pdf [file c3tb21170c.pdf]

Electronic Supplementary Information (ESI) for Journal of Materials Chemistry  
This journal is (c) The Royal Society of Chemistry 2013

---

Electronic Supplementary Information (ESI)

for

Biocompatible and acid-cleavable poly( $\epsilon$ -caprolactone)-*acetal*-poly(ethylene glycol)-*acetal*-poly( $\epsilon$ -caprolactone) triblock copolymers: Synthesis, characterization and pH-triggered doxorubicin delivery

*Hairong Wang<sup>a</sup>, Jinlin He<sup>a</sup>, Mingzu Zhang<sup>a</sup>, Yunfeng Tao<sup>a</sup>, Fei Li<sup>a</sup>, Kam Chiu Tam<sup>b</sup>, Peihong Ni<sup>a,\*</sup>*

<sup>a</sup> College of Chemistry, Chemical Engineering, and Materials Science, Jiangsu Key Laboratory of Advanced Functional Polymer Design and Application, Soochow University, Suzhou 215123, P. R. China. Fax: +86 512 65880089; Tel:+86 512 65882047; E-mail: [phni@suda.edu.cn](mailto:phni@suda.edu.cn)

<sup>b</sup> Department of Chemical Engineering, University of Waterloo, 200 University Avenue West, Waterloo, Ontario, N2L 3G1, Canada.

Electronic Supplementary Information (ESI) for Journal of Materials Chemistry  
 This journal is (c) The Royal Society of Chemistry 2013

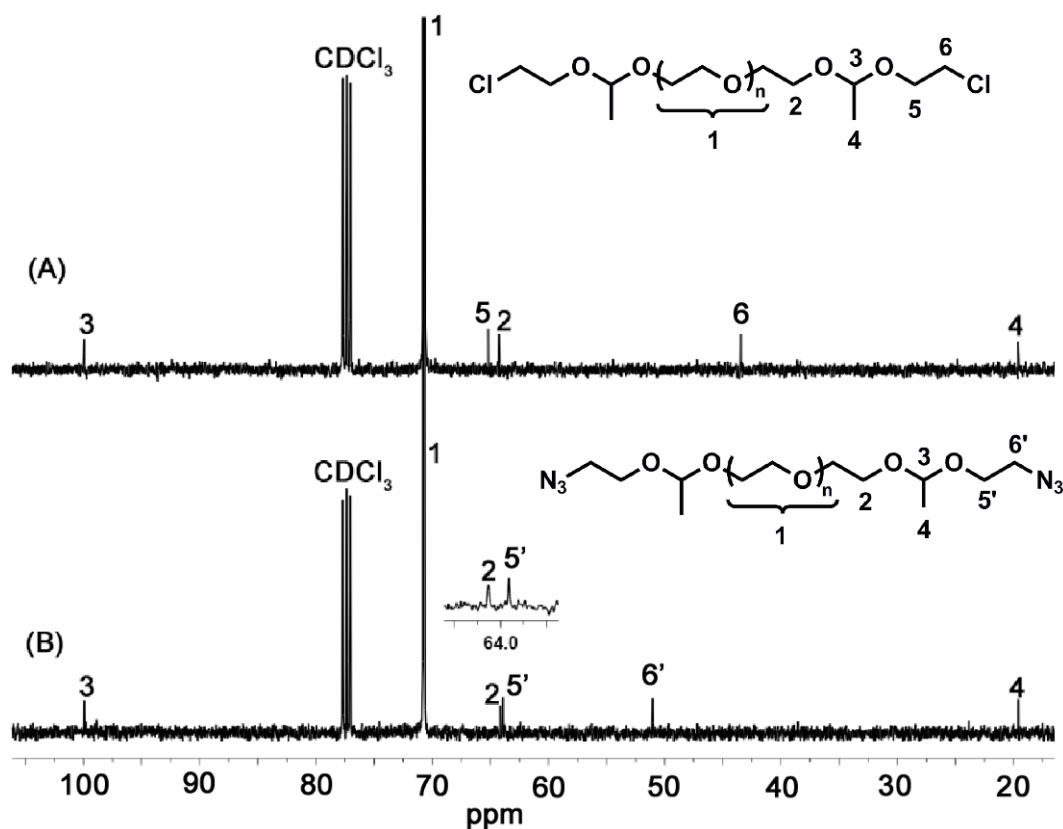

Fig. S1  $^{13}\text{C}$  NMR spectra of (A) Cl-*a*-PEG<sub>135</sub>-*a*-Cl and (B) N<sub>3</sub>-*a*-PEG<sub>135</sub>-*a*-N<sub>3</sub> in CDCl<sub>3</sub>.

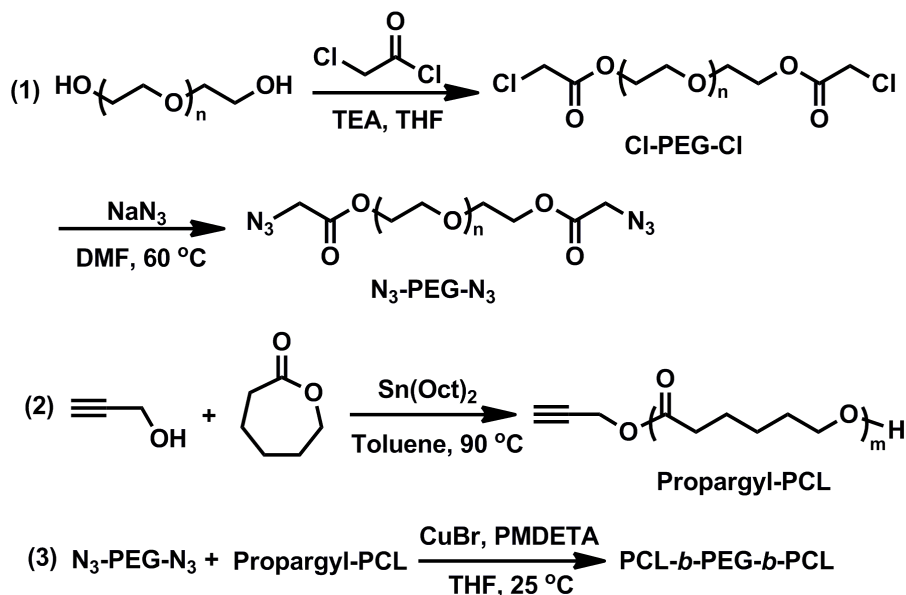

Scheme S1 Synthesis route of pH-insensitive triblock copolymer PCL-*b*-PEG-*b*-PCL.

Electronic Supplementary Information (ESI) for Journal of Materials Chemistry B  
This journal is (c) The Royal Society of Chemistry 2013

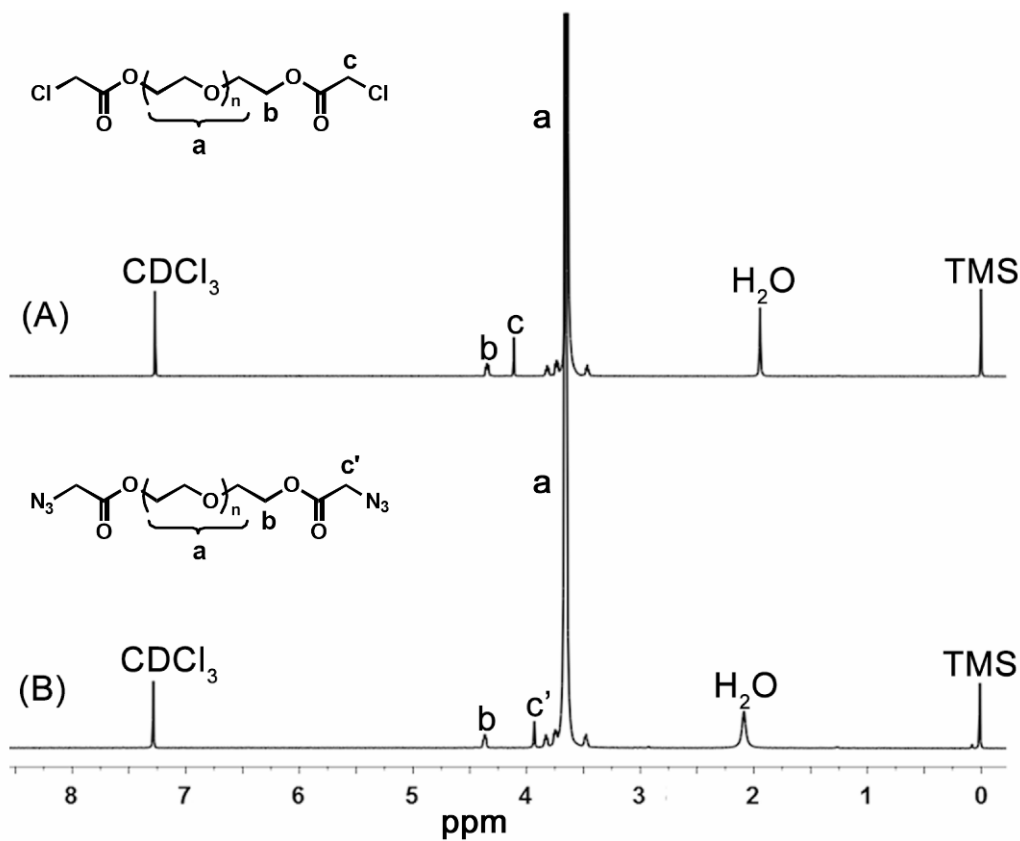

Fig. S2 <sup>1</sup>H NMR spectra of (A) Cl-PEG<sub>135</sub>-Cl and (B) N<sub>3</sub>-PEG<sub>135</sub>-N<sub>3</sub> in CDCl<sub>3</sub>.

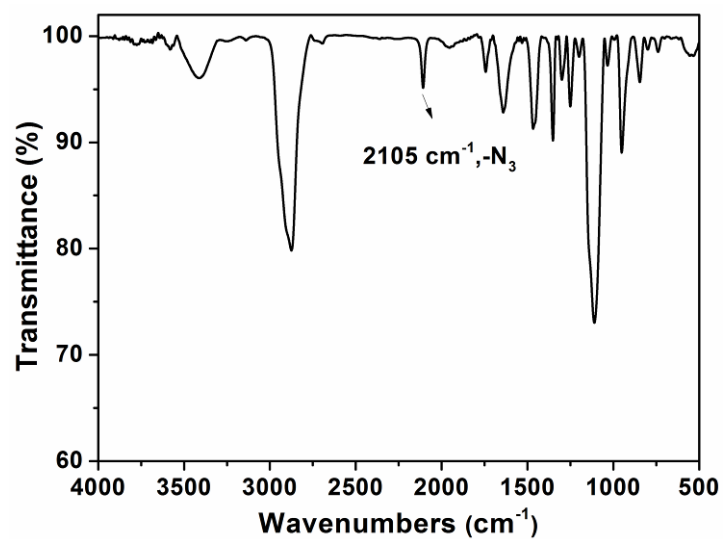

Fig. S3 FT-IR spectrum of N<sub>3</sub>-PEG<sub>135</sub>-N<sub>3</sub>.

Electronic Supplementary Information (ESI) for Journal of Materials Chemistry B  
 This journal is (c) The Royal Society of Chemistry 2013

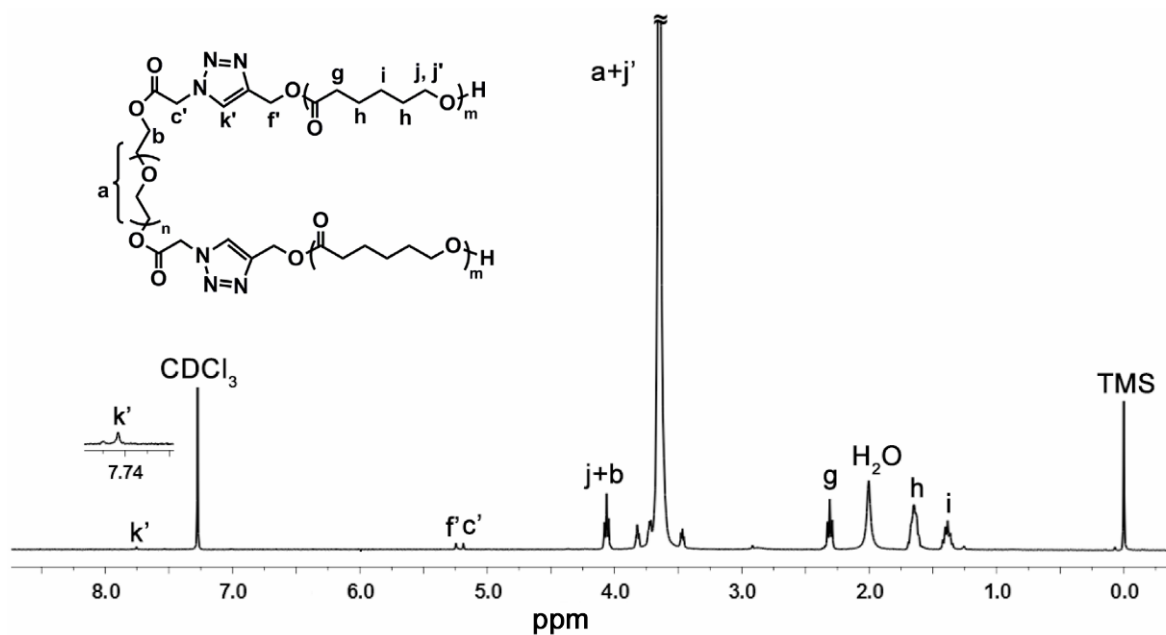

Fig. S4  $^1\text{H}$  NMR spectrum of  $\text{PCL}_{30}\text{-}b\text{-PEG}_{135}\text{-}b\text{-PCL}_{30}$  in  $\text{CDCl}_3$ .

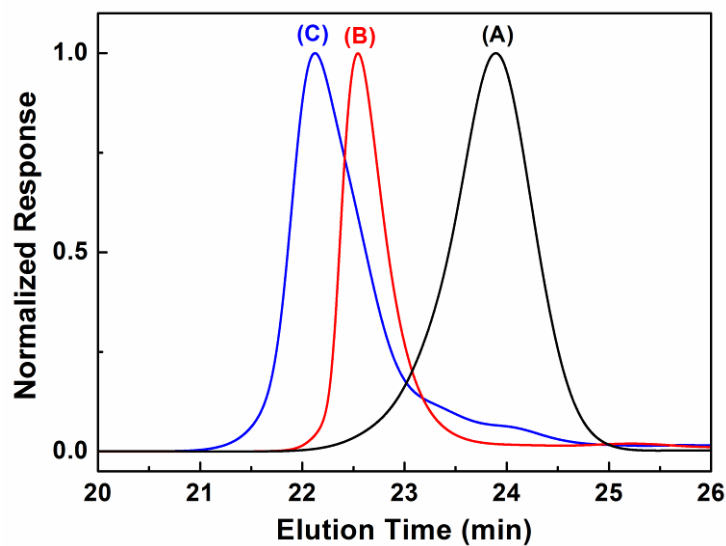

Fig. S5 GPC curves of (A) Propargyl- $\text{PCL}_{30}$  ( $\overline{M}_{n,\text{GPC}} = 3010 \text{ g mol}^{-1}$ , PDI = 1.19), (B)  $\text{N}_3\text{-PEG}_{135}\text{-N}_3$  ( $\overline{M}_{n,\text{GPC}} = 6950 \text{ g mol}^{-1}$ , PDI = 1.13), and (C)  $\text{PCL}_{30}\text{-}b\text{-PEG}_{135}\text{-}b\text{-PCL}_{30}$  ( $\overline{M}_{n,\text{GPC}} = 11070 \text{ g mol}^{-1}$ , PDI = 1.19).

Electronic Supplementary Information (ESI) for Journal of Materials Chemistry B  
This journal is (c) The Royal Society of Chemistry 2013

---

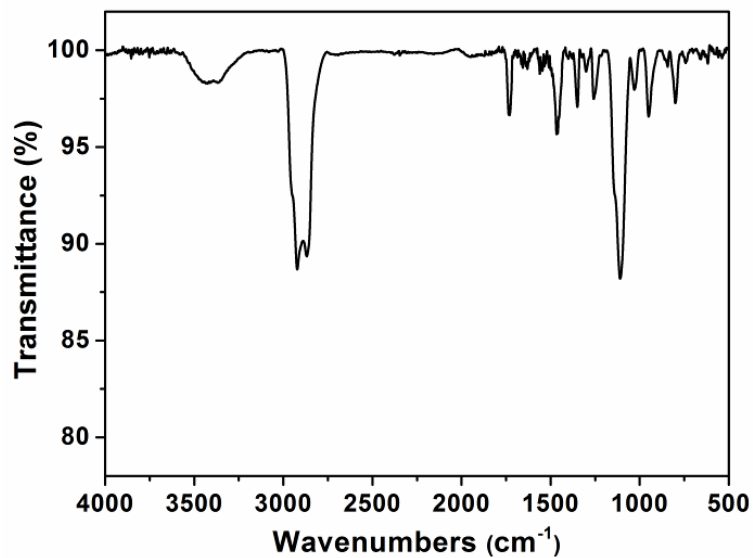

Fig. S6 FT-IR spectrum of PCL<sub>30</sub>-*b*-PEG<sub>135</sub>-*b*-PCL<sub>30</sub>.
